# Supplementary material for: Cross-sectional E-survey on the Incidence of Pre- and Postoperative Chronic Pain in Bariatric Surgery
Source: PubMed Central journal article supplement (PMC9834162; doi:10.1007/s11695-022-06354-9), 2022-11-08
Supplement: 11695_2022_6354_MOESM1_ESM.pdf [file 11695_2022_6354_MOESM1_ESM.pdf]

# Surveys of Dutch chronic pain study in obese patients - version 14.21

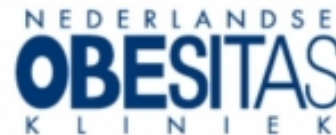

Printed on 07-10-2022 04:35:35 by Bart Torensma

## Survey 'Survey chronisch pijn na de operatie bij NOK west'

### Survey chronisch pijn na de operatie bij NOK west - Algemene gegevens.

| Number | Question                                                                                                                                         | Answers                                                                     |
|--------|--------------------------------------------------------------------------------------------------------------------------------------------------|-----------------------------------------------------------------------------|
|        | Rechts boven kunt u de knoppen op de Nederlandse taal zetten                                                                                     |                                                                             |
| 1.1    | Wilt u deelnemen aan dit onderzoek?                                                                                                              | <input type="radio"/> Ja<br><input type="radio"/> Nee                       |
|        | U kunt nu de volgende vragen invullen.                                                                                                           |                                                                             |
|        | Einde onderzoek. Druk rechtsonder op volgende tot u de vragenlijst kan afsluiten                                                                 |                                                                             |
|        | De volgende vragen hebben betrekking op uw algemene gegevens.                                                                                    |                                                                             |
| 1.1.4  | <b>If 'Wilt u deelnemen aan dit onderzoek?' is equal to 'Ja'</b><br><b>answer this question:</b><br>Wat is uw geboortedatum?                     | <input type="text"/> <input type="text"/> <input type="text"/> (dd-mm-yyyy) |
| 1.1.5  | <b>If 'Wilt u deelnemen aan dit onderzoek?' is equal to 'Ja'</b><br><b>answer this question:</b><br>Wat is uw geslacht?                          | <input type="radio"/> Man<br><input type="radio"/> Vrouw                    |
| 1.1.6  | <b>If 'Wilt u deelnemen aan dit onderzoek?' is equal to 'Ja'</b><br><b>answer this question:</b><br>Welk type operatie heeft u gehad bij de NOK? | <input type="radio"/> Sleeve<br><input type="radio"/> Gastric bypass        |
| 1.1.7  | <b>If 'Wilt u deelnemen aan dit onderzoek?' is equal to 'Ja'</b><br><b>answer this question:</b><br>Wanneer heeft deze operatie plaatsgevonden?  | <input type="text"/> (yyyy)                                                 |
| 1.1.8  | <b>If 'Wilt u deelnemen aan dit onderzoek?' is equal to 'Ja'</b><br><b>answer this question:</b><br>Heeft u hierna nog een heroperatie gehad?    | <input type="radio"/> Ja<br><input type="radio"/> Nee                       |

- 1.1.8.1 **If 'Heeft u hierna nog een heroperatie gehad?' is equal to 'Ja' answer this question:**  
Wat was de reden voor de heroperatie?
- Perforatie  
 Hernia  
 Bloeding  
 Passage probleem  
 Pijnklachten

- 1.1.9 **If 'Wilt u deelnemen aan dit onderzoek?' is equal to 'Ja' answer this question:**  
Wat is uw lengte in cm?
- lengte in cm.

- 1.1.10 **If 'Wilt u deelnemen aan dit onderzoek?' is equal to 'Ja' answer this question:**  
Wat was uw gewicht voor u geopereerd werd?
- gewicht in kilogram.

- 1.1.11 **If 'Wilt u deelnemen aan dit onderzoek?' is equal to 'Ja' answer this question:**  
Wat is uw gewicht op dit moment?
- gewicht in kilogram.

Klik rechts onder op "VOLGENDE"

## Survey chronisch pijn na de operatie bij NOK west - Voor uw operatie.

| Number | Question                                                                                                                                                                   | Answers                                                                                                 |
|--------|----------------------------------------------------------------------------------------------------------------------------------------------------------------------------|---------------------------------------------------------------------------------------------------------|
|        | De volgende vragen hebben betrekking op uw pijn voordat u geopereerd werd. Met langdurige pijn wordt bedoeld: langer dan 3 maanden.                                        |                                                                                                         |
| 2.1    | <b>If 'Wilt u deelnemen aan dit onderzoek?' is equal to 'Ja' answer this question:</b><br>Had u last van langdurige pijn (meer dan 3 maanden) voordat u geopereerd was?    | <input type="radio"/> Ja<br><input type="radio"/> Nee                                                   |
| 2.1.1  | <b>If 'Had u last van langdurige pijn (meer dan 3 maanden) voordat u geopereerd was?' is equal to 'Ja' answer this question:</b><br>Wat voor cijfer zou u deze pijn geven? | (0.00)<br>10<br>(10.00)<br>mate<br>van<br>pijn                                                          |
| 2.1.2  | <b>If 'Had u last van langdurige pijn (meer dan 3 maanden) voordat u geopereerd was?' is equal to 'Ja' answer this question:</b><br>Hoe ervoer u deze pijn?                | <input type="radio"/> Geen pijn<br><input type="radio"/> Matige pijn<br><input type="radio"/> Veel pijn |
| 2.1.3  | <b>If 'Had u last van langdurige pijn (meer dan 3 maanden) voordat u geopereerd was?' is equal to 'Ja' answer this question:</b>                                           | <input type="checkbox"/> Hoofd<br><input type="checkbox"/> Bovenarmen / schouders / nek                 |

Wat was de locatie van deze pijn?

- Handen / onderarmen  
 Borst  
 Buik  
 Rug  
 Bekken / billen / bovenbenen  
 Knieën  
 Onderbenen / voeten  
 Geslachtsdelen

2.1.4 ***If 'Had u last van langdurige pijn (meer dan 3 maanden) voordat u geopereerd was?' is equal to 'Ja' answer this question:***

Hoe verliep deze pijn?

- Constant en aanwezig in dezelfde mate  
 Constant aanwezig met afwisselende pijnpunten  
 Constant aanwezig en toenemend in de loop van de dag  
 Constant aanwezig en afnemend in de loop van de dag  
 In aanvallen die geleidelijk verergeren, afwisselend met milde pijn  
 In aanvallen die geleidelijk verergeren, afwisselend met geen pijn  
 In plotselinge aanvallen, afwisselend met milde pijn  
 In plotselinge aanvallen, afwisselend met geen pijn  
 Verschillend in patroon van aanwezigheid van pijn

Klik rechts onder op "VOLGENDE"

## Survey chronisch pijn na de operatie bij NOK west - Op de afdeling.

| Number | Question                                                                                                                                        | Answers                                               |                              |
|--------|-------------------------------------------------------------------------------------------------------------------------------------------------|-------------------------------------------------------|------------------------------|
|        | De volgende vragen hebben betrekking op eventuele pijn op de verpleegafdeling, de plek waar u bent bijgekomen/ opgenomen na de operatie.        |                                                       |                              |
| 3.1    | <b><i>If 'Wilt u deelnemen aan dit onderzoek?' is equal to 'Ja' answer this question:</i></b><br>Had u last van pijn op de verpleegafdeling?    | <input type="radio"/> Ja<br><input type="radio"/> Nee |                              |
| 3.1.1  | <b><i>If 'Had u last van pijn op de verpleegafdeling?' is equal to 'Ja' answer this question:</i></b><br>Wat voor cijfer zou u deze pijn geven? | (0.00)                                                | 10<br>(10.00)<br>mate<br>van |

pijn

- 3.1.2 ***If 'Had u last van pijn op de verpleegafdeling?' is equal to 'Ja' answer this question:***  
Hoe ervoer u deze pijn?
- Geen pijn  
 Matige pijn  
 Veel pijn

Klik rechts onder op "VOLGENDE"

## Survey chronisch pijn na de operatie bij NOK west - Toen u thuis kwam.

| Number | Question                                                                                                                                                  | Answers                                                                                                 |
|--------|-----------------------------------------------------------------------------------------------------------------------------------------------------------|---------------------------------------------------------------------------------------------------------|
|        | De volgende vragen hebben betrekking op eventuele pijn bij thuiskomst: het moment dat weer thuis kwam na de operatie.                                     |                                                                                                         |
| 4.1    | <b><i>If 'Wilt u deelnemen aan dit onderzoek?' is equal to 'Ja' answer this question:</i></b><br>Had u last van pijn in de eerste week van thuiskomst?    | <input type="radio"/> Ja<br><input type="radio"/> Nee                                                   |
| 4.1.1  | <b><i>If 'Had u last van pijn in de eerste week van thuiskomst?' is equal to 'Ja' answer this question:</i></b><br>Wat voor cijfer zou u deze pijn geven? | (0.00)                                                                                                  |
|        |                                                                                                                                                           | 10<br>(10.00)<br>mate<br>van<br>pijn                                                                    |
| 4.1.2  | <b><i>If 'Had u last van pijn in de eerste week van thuiskomst?' is equal to 'Ja' answer this question:</i></b><br>Hoe ervoer u deze pijn?                | <input type="radio"/> Geen pijn<br><input type="radio"/> Matige pijn<br><input type="radio"/> Veel pijn |

Klik rechts onder op "VOLGENDE"

## Survey chronisch pijn na de operatie bij NOK west - Op dit moment.

| Number | Question                                                                                      | Answers                                               |
|--------|-----------------------------------------------------------------------------------------------|-------------------------------------------------------|
|        | De volgende vragen hebben betrekking op eventuele pijn op dit moment.                         |                                                       |
| 5.1    | <b><i>If 'Wilt u deelnemen aan dit onderzoek?' is equal to 'Ja' answer this question:</i></b> | <input type="radio"/> Ja<br><input type="radio"/> Nee |

Heeft u nu last van pijn?

|       |                                                                                                                                      |                                                                                                                                                                                                                                                                                                                                                                                                                                                                                                                                                                                                                                                                                                                              |                           |
|-------|--------------------------------------------------------------------------------------------------------------------------------------|------------------------------------------------------------------------------------------------------------------------------------------------------------------------------------------------------------------------------------------------------------------------------------------------------------------------------------------------------------------------------------------------------------------------------------------------------------------------------------------------------------------------------------------------------------------------------------------------------------------------------------------------------------------------------------------------------------------------------|---------------------------|
| 5.1.1 | <p><b>If 'Heeft u nu last van pijn?' is equal to 'Ja' answer this question:</b><br/>Wat voor cijfer geeft u deze pijn?</p>           | (1.00)                                                                                                                                                                                                                                                                                                                                                                                                                                                                                                                                                                                                                                                                                                                       | (10.00)<br>mate van pijn. |
| 5.1.2 | <p><b>If 'Heeft u nu last van pijn?' is equal to 'Ja' answer this question:</b><br/>Wat is de locatie van deze pijn?</p>             | <input type="checkbox"/> Hoofd<br><input type="checkbox"/> Bovenarmen / schouders / nek<br><input type="checkbox"/> Handen / onderarmen<br><input type="checkbox"/> Borst<br><input type="checkbox"/> Buik<br><input type="checkbox"/> Rug<br><input type="checkbox"/> Bekken / billen / bovenbenen<br><input type="checkbox"/> Knieën<br><input type="checkbox"/> Onderbenen / voeten<br><input type="checkbox"/> Geslachtsdelen                                                                                                                                                                                                                                                                                            |                           |
| 5.1.3 | <p><b>If 'Heeft u nu last van pijn?' is equal to 'Ja' answer this question:</b><br/>Wat is het beloop van deze pijn?</p>             | <input type="radio"/> Constant en aanwezig in dezelfde mate<br><input type="radio"/> Constant aanwezig met afwisselende pijnpunten<br><input type="radio"/> Constant aanwezig en toenemend in de loop van de dag<br><input type="radio"/> Constant aanwezig en afnemend in de loop van de dag<br><input type="radio"/> In aanvallen die geleidelijk verergeren, afwisselend met milde pijn<br><input type="radio"/> In aanvallen die geleidelijk verergeren, afwisselend met geen pijn<br><input type="radio"/> In plotselinge aanvallen, afwisselend met milde pijn<br><input type="radio"/> In plotselinge aanvallen, afwisselend met geen pijn<br><input type="radio"/> Verschillend in patroon van aanwezigheid van pijn |                           |
| 5.1.4 | <p><b>If 'Heeft u nu last van pijn?' is equal to 'Ja' answer this question:</b><br/>Hoe lang heeft u al last van deze pijn?</p>      | <input type="text"/> tijd in maanden.                                                                                                                                                                                                                                                                                                                                                                                                                                                                                                                                                                                                                                                                                        |                           |
| 5.1.5 | <p><b>If 'Heeft u nu last van pijn?' is equal to 'Ja' answer this question:</b><br/>Hoe vaak heeft u per dag last van deze pijn?</p> | <input type="text"/> pijnklachten per dag.                                                                                                                                                                                                                                                                                                                                                                                                                                                                                                                                                                                                                                                                                   |                           |
| 5.1.6 | <p><b>If 'Heeft u nu last van pijn?' is equal to 'Ja' answer this question:</b><br/>Wanneer heeft u meer last van deze pijn?</p>     | <input type="checkbox"/> 's ochtends<br><input type="checkbox"/> 's middags<br><input type="checkbox"/> 's avonds<br><input type="checkbox"/> 's nachts<br><input type="checkbox"/> na maaltijden                                                                                                                                                                                                                                                                                                                                                                                                                                                                                                                            |                           |

bij w.c. bezoek

5.1.7 **If 'Heeft u nu last van pijn?' is equal to 'Ja' answer this question:**  
Pijn patronen

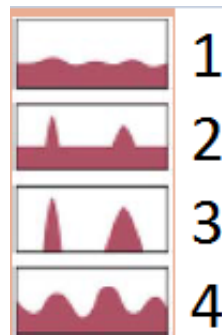

5.1.8 **If 'Heeft u nu last van pijn?' is equal to 'Ja' answer this question:**  
Wat is het patroon van uw pijn?

- 1  
 2  
 3  
 4

5.1.9 **If 'Heeft u nu last van pijn?' is equal to 'Ja' answer this question:**  
Gebruikt u medicatie tegen uw pijn?

- Ja  
 Nee

5.1.9.1 **If 'Gebruikt u medicatie tegen uw pijn?' is equal to 'Ja' answer this question:**  
Welke medicatie gebruikt u tegen uw pijn? (Meerdere antwoorden mogelijk)

- Paracetamol (Apotel, Daro, Panadol, Pinex)  
 Ibuprofen (Advil, Brufen, Nurofen, Sarixell, Spidifen, Zafen)  
 Diclofenac (Cataflam,, Voltaren)  
 Naproxen (Aleve)  
 Tramadol (Tramal, Zaldiar, Tramagetic)  
 Morfine (Oramorph, Kapanol, MS Contin)  
 Oxycodon ( OxyContin, OxyNorm, Targinact)  
 Fentanyl (Durogesic, Fentanyl Pleisters, Ionsys)  
 Pregabaline (Lyrica)  
 Gabapentine (Neurontin)  
 Duloxetine (Cymbalta, Xeristar)  
 Amitriptyline (Sarotex)  
 Paroxetine (Seroxat)  
 Fluoxetine (Prozac)  
 Sertraline (Zoloft)  
 Citalopram (Cipramil)  
 Venlafaxine (Efexor)  
 Lorazepam (Temesta)  
 Diazepam (Diazemuls, Stesolid)  
 Bromazepam  
 Lormetazepam (Noctamid)  
 Nitrazepam  
 Etoricoxib (Arcoxia, Auxib)  
 Nortriptyline (Nortrilen)

- Carbamazepine (Tegretol)
- Lidocaine (Versatis)
- Capsaïcine crème
- Capsaïcine pleister (Qutenza)
- Codeïne (Paracetamol/Codeïne)
- Paracetamol/Coffeïne (Panadol)
- Acetylsalicylzuur/Paracetamol/Coffeïne (APC, Excedrin)
- Paracetamol/Propyfenazon/Coffeïne (Daro, Paradon, Sanalgin, Saridon)

|           |                                                                                                                                                                                                                                    |                                                                              |                 |
|-----------|------------------------------------------------------------------------------------------------------------------------------------------------------------------------------------------------------------------------------------|------------------------------------------------------------------------------|-----------------|
| 5.1.9.1.1 | <b>If 'Welke medicatie gebruikt u tegen uw pijn? (Meerdere antwoorden mogelijk)' is equal to 'Capsaïcine crème' answer this question:</b><br>Welke capsaïcine crème gebruikt u?                                                    | <input type="radio"/> Crème (0,025%)<br><input type="radio"/> Crème (0,075%) |                 |
| 5.1.9.1.2 | <b>If 'Welke medicatie gebruikt u tegen uw pijn? (Meerdere antwoorden mogelijk)' is equal to 'Paracetamol (Apotel, Daro, Panadol, Pinex)' answer this question:</b><br>Hoeveel mg paracetamol gebruikt u per dag?                  | (1000.00)                                                                    | (4000.00)<br>mg |
| 5.1.9.1.3 | <b>If 'Welke medicatie gebruikt u tegen uw pijn? (Meerdere antwoorden mogelijk)' is equal to 'Ibuprofen (Advil, Brufen, Nurofen, Sarixell, Spidifen, Zafen)' answer this question:</b><br>Hoeveel mg ibuprofen gebruikt u per dag? | (200.00)                                                                     | (1200.00)<br>mg |
| 5.1.9.1.4 | <b>If 'Welke medicatie gebruikt u tegen uw pijn? (Meerdere antwoorden mogelijk)' is equal to 'Diclofenac (Cataflam,, Voltaren)' answer this question:</b><br>Hoeveel mg diclofenac gebruikt u per dag?                             | (12.50)                                                                      | (100.00)<br>mg  |
| 5.1.9.1.5 | <b>If 'Welke medicatie gebruikt u tegen uw pijn? (Meerdere antwoorden mogelijk)' is equal to 'Naproxen (Aleve)' answer this question:</b><br>Hoeveel mg naproxen gebruikt u per dag?                                               | (250.00)                                                                     | (1500.00)<br>mg |
| 5.1.9.1.6 | <b>If 'Welke medicatie gebruikt u tegen uw pijn? (Meerdere antwoorden mogelijk)' is equal to 'Tramadol (Tramal, Zaldiar, Tramagetic)' answer this question:</b><br>Hoeveel mg tramadol gebruikt u per dag?                         | (25.00)                                                                      | (200.00)<br>mg  |
| 5.1.9.1.7 | <b>If 'Welke medicatie gebruikt u tegen uw pijn? (Meerdere antwoorden mogelijk)' is equal to 'Morfine (Oramorph, Kapanol, MS Contin)' answer this question:</b><br>Hoeveel mg morfine gebruikt u per dag?                          | (10.00)                                                                      | (150.00)<br>mg  |
| 5.1.9.1.8 | <b>If 'Welke medicatie gebruikt u tegen uw pijn?'</b>                                                                                                                                                                              | (5.00)                                                                       | (80.00)<br>mg   |

**(Meerdere antwoorden mogelijk)' is equal to  
'Oxycodon ( OxyContin, OxyNorm, Targinact)' answer  
this question:  
Hoeveel mg oxycodon gebruikt u per dag?**

|            |                                                                                                                                                                                                                                               |          |                 |
|------------|-----------------------------------------------------------------------------------------------------------------------------------------------------------------------------------------------------------------------------------------------|----------|-----------------|
| 5.1.9.1.9  | <b>If 'Welke medicatie gebruikt u tegen uw pijn?<br/>(Meerdere antwoorden mogelijk)' is equal to 'Fentanyl<br/>(Durogesic, Fentanyl Pleisters, Ionsys)' answer this<br/>question:<br/>Hoeveel mcg fentanyl (pleister) gebruikt u per dag?</b> | (25.00)  | (250.00)<br>mcg |
| 5.1.9.1.10 | <b>If 'Welke medicatie gebruikt u tegen uw pijn?<br/>(Meerdere antwoorden mogelijk)' is equal to<br/>'Pregabaline (Lyrica)' answer this question:<br/>Hoeveel mg pregabaline gebruikt u per dag?</b>                                          | (75.00)  | (300.00)<br>mg  |
| 5.1.9.1.11 | <b>If 'Welke medicatie gebruikt u tegen uw pijn?<br/>(Meerdere antwoorden mogelijk)' is equal to<br/>'Gabapentine (Neurontin)' answer this question:<br/>Hoeveel mg gabapentine gebruikt u per dag?</b>                                       | (100.00) | (800.00)<br>mg  |
| 5.1.9.1.12 | <b>If 'Welke medicatie gebruikt u tegen uw pijn?<br/>(Meerdere antwoorden mogelijk)' is equal to<br/>'Duloxetine (Cymbalta, Xeristar)' answer this question:<br/>Hoeveel mg duloxetine gebruikt u per dag?</b>                                | (30.00)  | (240.00)<br>mg  |
| 5.1.9.1.13 | <b>If 'Welke medicatie gebruikt u tegen uw pijn?<br/>(Meerdere antwoorden mogelijk)' is equal to<br/>'Amitriptyline (Sarotex)' answer this question:<br/>Hoeveel mg amitriptyline gebruikt u per dag?</b>                                     | (10.00)  | (100.00)<br>mg  |
| 5.1.9.1.14 | <b>If 'Welke medicatie gebruikt u tegen uw pijn?<br/>(Meerdere antwoorden mogelijk)' is equal to<br/>'Paroxetine (Seroxat)' answer this question:<br/>Hoeveel mg paroxetine gebruikt u per dag?</b>                                           | (10.00)  | (100.00)<br>mg  |
| 5.1.9.1.15 | <b>If 'Welke medicatie gebruikt u tegen uw pijn?<br/>(Meerdere antwoorden mogelijk)' is equal to<br/>'Fluoxetine (Prozac)' answer this question:<br/>Hoeveel mg fluoxetine gebruikt u per dag?</b>                                            | (20.00)  | (120.00)<br>mg  |
| 5.1.9.1.16 | <b>If 'Welke medicatie gebruikt u tegen uw pijn?<br/>(Meerdere antwoorden mogelijk)' is equal to 'Sertraline<br/>(Zoloft)' answer this question:<br/>Hoeveel mg sertraline gebruikt u per dag?</b>                                            | (25.00)  | (200.00)<br>mg  |
| 5.1.9.1.17 | <b>If 'Welke medicatie gebruikt u tegen uw pijn?<br/>(Meerdere antwoorden mogelijk)' is equal to<br/>'Citalopram (Cipramil)' answer this question:<br/>Hoeveel mg citalopram gebruikt u per dag?</b>                                          | (10.00)  | (100.00)<br>mg  |
| 5.1.9.1.18 | <b>If 'Welke medicatie gebruikt u tegen uw pijn?</b>                                                                                                                                                                                          |          | (300.00)        |



|             |                                                                                                                                                                                                    |             |                         |
|-------------|----------------------------------------------------------------------------------------------------------------------------------------------------------------------------------------------------|-------------|-------------------------|
|             | <b>(Meerdere antwoorden mogelijk)' is equal to 'Venlafaxine (Efexor)' answer this question:</b><br>Hoeveel mg venlafaxine gebruikt u per dag?                                                      | (37.50)     | mg                      |
| 5.1.9.1.19  | <b>If 'Welke medicatie gebruikt u tegen uw pijn? (Meerdere antwoorden mogelijk)' is equal to 'Lorazepam (Temesta)' answer this question:</b><br>Hoeveel mg lorazepam gebruikt u per dag?           | (0.50)      | (10.00)<br>mg           |
| 5.1.9.1.20  | <b>If 'Welke medicatie gebruikt u tegen uw pijn? (Meerdere antwoorden mogelijk)' is equal to 'Diazepam (Diazemuls, Stesolid)' answer this question:</b><br>Hoeveel mg diazepam gebruikt u per dag? | (2.50)      | (50.00)<br>mg           |
| 5.1.9.1.21  | <b>If 'Welke medicatie gebruikt u tegen uw pijn? (Meerdere antwoorden mogelijk)' is equal to 'Bromazepam' answer this question:</b><br>Hoeveel mg bromazepam gebruikt u per dag?                   | (3.00)      | (30.00)<br>mg           |
| 5.1.9.1.22  | <b>If 'Welke medicatie gebruikt u tegen uw pijn? (Meerdere antwoorden mogelijk)' is equal to 'Lormetazepam (Noctamid)' answer this question:</b><br>Hoeveel mg lormetazepam gebruikt u per dag?    | (1.00)      | (10.00)<br>mg           |
| 5.1.9.1.23  | <b>If 'Welke medicatie gebruikt u tegen uw pijn? (Meerdere antwoorden mogelijk)' is equal to 'Nitrazepam' answer this question:</b><br>Hoeveel mg nitrazepam gebruikt u per dag?                   | (5.00)      | (40.00)<br>mg           |
| 5.1.9.1.24  | <b>If 'Welke medicatie gebruikt u tegen uw pijn? (Meerdere antwoorden mogelijk)' is equal to 'Etoricoxib (Arcoxia, Auxib)' answer this question:</b><br>Hoeveel mg etoricoxib gebruikt u per dag?  | (60.00)     | (150.00)<br>mg          |
| 5.1.9.1.25  | <b>If 'Welke medicatie gebruikt u tegen uw pijn? (Meerdere antwoorden mogelijk)' is equal to 'Nortriptyline (Nortrilen)' answer this question:</b><br>Hoeveel mg nortriptyline gebruikt u per dag? | (10.00)     | (100.00)<br>mg          |
| 5.1.9.1.26  | <b>If 'Welke medicatie gebruikt u tegen uw pijn? (Meerdere antwoorden mogelijk)' is equal to 'Carbamazepine (Tegretol)' answer this question:</b><br>Hoeveel mg carbamazepine gebruikt u per dag?  | (100.00)    | (800.00)<br>mg          |
| 5.1.9.1.27  | <b>If 'Welke medicatie gebruikt u tegen uw pijn? (Meerdere antwoorden mogelijk)' is equal to 'Lidocaine (Versatis)' answer this question:</b><br>Hoeveel mg lidocaine gebruikt u per dag?          | (700.00)    | (2100.00)<br>mg         |
| 5.1.9.1.1.1 | <b>If 'Welke capsäicine crème gebruikt u?' is equal to 'Crème (0,025%)' answer this question:</b><br>Hoeveel mg capsäicine crème (0,025%) gebruikt u per                                           | 1<br>vinger | 10<br>vingers<br>(2.50) |

|             |                                                                                                                                                                                                                                                                   |                       |                               |
|-------------|-------------------------------------------------------------------------------------------------------------------------------------------------------------------------------------------------------------------------------------------------------------------|-----------------------|-------------------------------|
|             | dag?                                                                                                                                                                                                                                                              | (0.25)                | mg                            |
| 5.1.9.1.1.2 | <b>If 'Welke capsäicaine crème gebruikt u?' is equal to 'Crème (0,075%)' answer this question:</b><br>Hoeveel mg capsäicaine crème (0,075%) gebruikt u per dag?                                                                                                   | 1<br>vinger<br>(0.75) | 10<br>vingers<br>(7.50)<br>mg |
| 5.1.9.1.28  | <b>If 'Welke medicatie gebruikt u tegen uw pijn? (Meerdere antwoorden mogelijk)' is equal to 'Capsäicaine pleister (Qutenza)' answer this question:</b><br>Hoeveel mg capsäicaine pleister gebruikt u per dag?                                                    | (180.00)              | (720.00)<br>mg                |
| 5.1.9.1.29  | <b>If 'Welke medicatie gebruikt u tegen uw pijn? (Meerdere antwoorden mogelijk)' is equal to 'Paracetamol/Coffeïne (Panadol)' answer this question:</b><br>Hoeveel mg paracetamol/coffeïne gebruikt u per dag?                                                    | (550.00)              | (3300.00)<br>mg               |
| 5.1.9.1.30  | <b>If 'Welke medicatie gebruikt u tegen uw pijn? (Meerdere antwoorden mogelijk)' is equal to 'Codeïne (Paracetamol/Codeïne)' answer this question:</b><br>Hoeveel mg codeïne gebruikt u per dag?                                                                  | (10.00)               | (100.00)<br>mg                |
| 5.1.9.1.31  | <b>If 'Welke medicatie gebruikt u tegen uw pijn? (Meerdere antwoorden mogelijk)' is equal to 'Acetylsalicylzuur/Paracetamol/Coffeïne (APC, Excedrin)' answer this question:</b><br>Hoeveel mg acetylsalicylzuur/paracetamol/coffeïne gebruikt u per dag?          | (550.00)              | (3300.00)<br>mg               |
| 5.1.9.1.32  | <b>If 'Welke medicatie gebruikt u tegen uw pijn? (Meerdere antwoorden mogelijk)' is equal to 'Paracetamol/Propyfenazon/Coffeïne (Daro, Paradon, Sanalgin, Saridon)' answer this question:</b><br>Hoeveel mg paracetamol/propyfenazon/coffeïne gebruikt u per dag? | (450.00)              | (1800.00)<br>mg               |

Klik rechts onder op "VOLGENDE"

## Survey chronisch pijn na de operatie bij NOK west - Korte Pijn Inventarisatie

| Number | Question                                                                                                                              | Answers                                               |
|--------|---------------------------------------------------------------------------------------------------------------------------------------|-------------------------------------------------------|
| 6.1    | <b>If 'Heeft u nu last van pijn?' is equal to 'Ja' answer this question:</b><br>Tijdens ons leven hebben de meesten van ons af en toe | <input type="radio"/> Ja<br><input type="radio"/> Nee |

pijn gehad (zoals lichte hoofdpijn, verstuikingen en kiespijn). Heeft u vandaag pijn gehad, anders dan deze alledaagse soorten pijn?

|       |                                                                                                                                                                                                                                                                                                                    |                                                                                                                                                                                                                                                                                                                                                                                                                                   |                                                  |
|-------|--------------------------------------------------------------------------------------------------------------------------------------------------------------------------------------------------------------------------------------------------------------------------------------------------------------------|-----------------------------------------------------------------------------------------------------------------------------------------------------------------------------------------------------------------------------------------------------------------------------------------------------------------------------------------------------------------------------------------------------------------------------------|--------------------------------------------------|
| 6.1.1 | <p><b>If 'Tijdens ons leven hebben de meesten van ons af en toe pijn gehad (zoals lichte hoofdpijn, verstuikingen en kiespijn). Heeft u vandaag pijn gehad, anders dan deze alledaagse soorten pijn?' is equal to 'Ja' answer this question:</b><br/>Wat is de locatie van deze pijn?</p>                          | <input type="checkbox"/> Hoofd<br><input type="checkbox"/> Bovenarmen / schouders / nek<br><input type="checkbox"/> Handen / onderarmen<br><input type="checkbox"/> Borst<br><input type="checkbox"/> Buik<br><input type="checkbox"/> Rug<br><input type="checkbox"/> Bekken / billen / bovenbenen<br><input type="checkbox"/> Knieën<br><input type="checkbox"/> Onderbenen / voeten<br><input type="checkbox"/> Geslachtsdelen |                                                  |
| 6.1.2 | <p><b>If 'Tijdens ons leven hebben de meesten van ons af en toe pijn gehad (zoals lichte hoofdpijn, verstuikingen en kiespijn). Heeft u vandaag pijn gehad, anders dan deze alledaagse soorten pijn?' is equal to 'Ja' answer this question:</b><br/>Hoeveel pijn heeft u als uw pijn op zijn ERGST is?</p>        | (0.00)                                                                                                                                                                                                                                                                                                                                                                                                                            | 10<br>(10.00)<br>mate van pijn                   |
| 6.1.3 | <p><b>If 'Tijdens ons leven hebben de meesten van ons af en toe pijn gehad (zoals lichte hoofdpijn, verstuikingen en kiespijn). Heeft u vandaag pijn gehad, anders dan deze alledaagse soorten pijn?' is equal to 'Ja' answer this question:</b><br/>Hoeveel pijn heeft u als uw pijn op zijn HET MINST is?</p>    | (0.00)                                                                                                                                                                                                                                                                                                                                                                                                                            | 10<br>(10.00)<br>mate van pijn                   |
| 6.1.4 | <p><b>If 'Tijdens ons leven hebben de meesten van ons af en toe pijn gehad (zoals lichte hoofdpijn, verstuikingen en kiespijn). Heeft u vandaag pijn gehad, anders dan deze alledaagse soorten pijn?' is equal to 'Ja' answer this question:</b><br/>Hoeveel pijn heeft u de afgelopen 24-uur GEMIDDELD gehad?</p> | (0.00)                                                                                                                                                                                                                                                                                                                                                                                                                            | 10<br>(10.00)<br>mate van pijn                   |
| 6.1.5 | <p><b>If 'Tijdens ons leven hebben de meesten van ons af en toe pijn gehad (zoals lichte hoofdpijn, verstuikingen en kiespijn). Heeft u vandaag pijn gehad, anders dan deze alledaagse soorten pijn?' is equal to 'Ja' answer this question:</b><br/>Hoeveel pijn heeft u op DIT moment?</p>                       | (0.00)                                                                                                                                                                                                                                                                                                                                                                                                                            | 10<br>(10.00)<br>mate van pijn                   |
| 6.1.6 | <p><b>If 'Tijdens ons leven hebben de meesten van ons af en toe pijn gehad (zoals lichte hoofdpijn, verstuikingen en kiespijn). Heeft u vandaag pijn gehad, anders dan deze alledaagse soorten pijn?' is equal to 'Ja' answer this question:</b><br/>Hoeveel verlichting hebben pijnbehandelingen of</p>           | (0.00)                                                                                                                                                                                                                                                                                                                                                                                                                            | 100<br>(100.00)<br>mate van verlichting van pijn |

medicijnen u in de afgelopen 24 uur gegeven? Kunt u dit in een percentage tussen 0 en 100 aangeven met 0% is geen verlichting en 100% is volledige verlichting.

Geef het ene nummer dat het beste omschrijft hoe de pijn in de afgelopen 24-uur belemmerend heeft gewerkt op uw:

|        |                                                                                                                                                                                                                                                                                                                                                                                                             |        |                                    |
|--------|-------------------------------------------------------------------------------------------------------------------------------------------------------------------------------------------------------------------------------------------------------------------------------------------------------------------------------------------------------------------------------------------------------------|--------|------------------------------------|
| 6.1.8  | <p><b><i>If 'Tijdens ons leven hebben de meesten van ons af en toe pijn gehad (zoals lichte hoofdpijn, verstuikingen en kiespijn). Heeft u vandaag pijn gehad, anders dan deze alledaagse soorten pijn?' is equal to 'Ja' answer this question:</i></b></p> <p>ALGEMENE ACTIVITEIT: Hoeveel heeft u dit belemmerd de afgelopen 24 uur</p>                                                                   | (0.00) | 10<br>(10.00) mate van belemmering |
| 6.1.9  | <p><b><i>If 'Tijdens ons leven hebben de meesten van ons af en toe pijn gehad (zoals lichte hoofdpijn, verstuikingen en kiespijn). Heeft u vandaag pijn gehad, anders dan deze alledaagse soorten pijn?' is equal to 'Ja' answer this question:</i></b></p> <p>STEMMING: Hoeveel heeft u dit belemmerd de afgelopen 24 uur</p>                                                                              | (0.00) | 10<br>(10.00) mate van belemmering |
| 6.1.10 | <p><b><i>If 'Tijdens ons leven hebben de meesten van ons af en toe pijn gehad (zoals lichte hoofdpijn, verstuikingen en kiespijn). Heeft u vandaag pijn gehad, anders dan deze alledaagse soorten pijn?' is equal to 'Ja' answer this question:</i></b></p> <p>LOOPVERMOGEN: Hoeveel heeft u dit belemmerd de afgelopen 24 uur</p>                                                                          | (0.00) | 10<br>(10.00) mate van belemmering |
| 6.1.11 | <p><b><i>If 'Tijdens ons leven hebben de meesten van ons af en toe pijn gehad (zoals lichte hoofdpijn, verstuikingen en kiespijn). Heeft u vandaag pijn gehad, anders dan deze alledaagse soorten pijn?' is equal to 'Ja' answer this question:</i></b></p> <p>NORMALE WERKZAAMHEDEN (hieronder valt zowel werk buitenshuis als huishoudelijk werk) : Hoeveel heeft u dit belemmerd de afgelopen 24 uur</p> | (0.00) | 10<br>(10.00) mate van belemmering |
| 6.1.12 | <p><b><i>If 'Tijdens ons leven hebben de meesten van ons af en toe pijn gehad (zoals lichte hoofdpijn, verstuikingen en kiespijn). Heeft u vandaag pijn gehad, anders dan deze alledaagse soorten pijn?' is equal to 'Ja' answer this question:</i></b></p> <p>RELATIE MET ANDERE MENSEN : Hoeveel heeft u dit belemmerd de afgelopen 24 uur</p>                                                            | (0.00) | 10<br>(10.00) mate van belemmering |
| 6.1.13 | <p><b><i>If 'Tijdens ons leven hebben de meesten van ons af en toe pijn gehad (zoals lichte hoofdpijn, verstuikingen en kiespijn). Heeft u vandaag pijn gehad, anders dan deze alledaagse soorten pijn?' is equal to 'Ja' answer this question:</i></b></p>                                                                                                                                                 | (0.00) | 10<br>(10.00) mate van belemmering |

**question:**

SLAAP: Hoeveel heeft u dit belemmerd de afgelopen 24 uur

|        |                                                                                                                                                                                                                                                                                                                          |        |                                    |
|--------|--------------------------------------------------------------------------------------------------------------------------------------------------------------------------------------------------------------------------------------------------------------------------------------------------------------------------|--------|------------------------------------|
| 6.1.14 | <b>If 'Tijdens ons leven hebben de meesten van ons af en toe pijn gehad (zoals lichte hoofdpijn, verstuikingen en kiespijn). Heeft u vandaag pijn gehad, anders dan deze alledaagse soorten pijn?' is equal to 'Ja' answer this question:</b><br>PLEZIER IN HET LEVEN: Hoeveel heeft u dit belemmerd de afgelopen 24 uur | (0.00) | 10<br>(10.00) mate van belemmering |
|--------|--------------------------------------------------------------------------------------------------------------------------------------------------------------------------------------------------------------------------------------------------------------------------------------------------------------------------|--------|------------------------------------|

Klik rechts onder op "VOLGENDE"

## Survey chronisch pijn na de operatie bij NOK west - Toen en nu.

| Number  | Question                                                                                                                                                             | Answers                                                                                                |
|---------|----------------------------------------------------------------------------------------------------------------------------------------------------------------------|--------------------------------------------------------------------------------------------------------|
|         | De volgende vragen gaan over pijn voor de operatie en pijn op dit moment.                                                                                            |                                                                                                        |
| 7.1.2   | <b>If 'Calculatie pre- en post pijn' is equal to '1' answer this question:</b><br>Was de pijn van v&oacute;&oacute;r de operatie dezelfde pijn als nu?               | <input type="radio"/> Ja<br><input type="radio"/> Nee                                                  |
| 7.1.2.1 | <b>If 'Was de pijn van v&amp;oacute;r de operatie dezelfde pijn als nu?' is equal to 'Ja' answer this question:</b><br>Hoe is deze pijn sinds de operatie veranderd? | <input type="radio"/> Verminderd<br><input type="radio"/> Hetzelfde<br><input type="radio"/> Verergerd |
|         | Dit onderdeel is niet bij u van toepassing. U kunt verder gaan.                                                                                                      |                                                                                                        |
|         | Klik rechts onder op "VOLGENDE"                                                                                                                                      |                                                                                                        |
